# Supplementary material
Source: PubMed Central journal article supplement (PMC7251450)
Supplement: jama-323-2029-s003.pdf [file jama-323-2029-s003.pdf]

## Supplementary Online Content

Baxter BT, Matsumura J, Curci JA, et al; the N-TA3CT Investigators. Effect of doxycycline on aneurysm growth among patients with small infrarenal abdominal aortic aneurysms: a randomized clinical trial. *JAMA*. doi:10.1001/jama.2020.5230

**eTable 1.** Baseline Characteristics for Patients Not Included in the Final Analysis Plan

**eAppendix 1.** Sex by Treatment Interaction

**eTable 2.** MMP-9 and CRP Levels

**eTable 3.** Frequency of Expected Adverse Events

**eTable 4.** Doxycycline Levels

This supplementary material has been provided by the authors to give readers additional information about their work.

**eTable 1. Baseline Characteristics for Patients Not Included in the Final Analysis Plan**

|                                                                               |                                           | Doxycycline<br>(N = 4) | Placebo<br>(N = 3) |
|-------------------------------------------------------------------------------|-------------------------------------------|------------------------|--------------------|
| <b>Demographics</b>                                                           |                                           |                        |                    |
| Age (years)                                                                   | Mean (std dev)                            | 72.8 (11.4)            | 79.3 (1.5)         |
|                                                                               |                                           | n (%)                  | n (%)              |
| Gender                                                                        | Female                                    | 1 ( 25%)               | 1 ( 33%)           |
|                                                                               | Male                                      | 3 ( 75%)               | 2 ( 67%)           |
| <b>Health Status</b>                                                          |                                           |                        |                    |
| Smoking Status                                                                | Current Smoker                            | 2 ( 50%)               | 1 ( 33%)           |
|                                                                               | Former Smoker                             | 2 ( 50%)               | 1 ( 33%)           |
|                                                                               | Never Smoked                              | 0 ( 0%)                | 1 ( 33%)           |
| Coronary Artery Disease                                                       |                                           | 1 ( 25%)               | 1 ( 33%)           |
| Congestive Heart Failure                                                      |                                           | 0 ( 0%)                | 0 ( 0%)            |
| Atrial Fibrillation                                                           |                                           | 0 ( 0%)                | 1 ( 33%)           |
| Stroke                                                                        |                                           | 0 ( 0%)                | 0 ( 0%)            |
| Cancer                                                                        |                                           | 1 ( 25%)               | 1 ( 33%)           |
| Chronic Obstructive Pulmonary Disease                                         |                                           | 1 ( 25%)               | 0 ( 0%)            |
| Diabetes Mellitus                                                             |                                           | 1 ( 25%)               | 0 ( 0%)            |
| Hypercholesteremia                                                            |                                           | 1 ( 25%)               | 3 (100%)           |
| Any family members know to have been diagnosed with abdominal aortic aneurysm |                                           | 1 ( 25%)               | 0 ( 0%)            |
| <b>Medication</b>                                                             |                                           |                        |                    |
| Beta Blocker                                                                  |                                           | 1 ( 25%)               | 3 (100%)           |
| ACE Inhibitor                                                                 |                                           | 3 ( 75%)               | 2 ( 67%)           |
| Angiotensin Receptor Blocker                                                  |                                           | 1 ( 25%)               | 0 ( 0%)            |
| Calcium Channel Blocker                                                       |                                           | 1 ( 25%)               | 0 ( 0%)            |
| Diuretics                                                                     |                                           | 0 ( 0%)                | 1 ( 33%)           |
| Use of Any anti-hypertensive                                                  |                                           | 4 (100%)               | 3 (100%)           |
| Daily Aspirin                                                                 |                                           | 2 ( 50%)               | 3 (100%)           |
| Other antiplatelet                                                            |                                           | 0 ( 0%)                | 1 ( 33%)           |
| Aspirin or other antiplatelet                                                 |                                           | 2 ( 50%)               | 3 (100%)           |
| Statin                                                                        |                                           | 0 ( 0%)                | 3 (100%)           |
| <b>Aneurysm Maximal Transverse Diameter</b>                                   |                                           |                        |                    |
| Overall                                                                       | N                                         | 4                      | 3                  |
|                                                                               | Mean (std dev)                            | 4.0 (0.4)              | 4.2 (0.6)          |
|                                                                               | Median                                    | 4.1                    | 3.9                |
|                                                                               | 25 <sup>th</sup> , 75 <sup>th</sup> %-ile | 3.7, 4.3               | 3.7, 4.9           |
| Men                                                                           | N                                         | 3                      | 2                  |
|                                                                               | Mean (std dev)                            | 4.2 (0.2)              | 4.3 (0.8)          |
|                                                                               | Median                                    | 4.3                    | 4.3                |
|                                                                               | 25 <sup>th</sup> , 75 <sup>th</sup> %-ile | 3.9, 4.4               | 3.7, 4.9           |
| Women                                                                         | N                                         | 1                      | 1                  |
|                                                                               | Mean (std dev)                            | 3.5 ( )                | 3.9 ( )            |
|                                                                               | Median                                    | 3.5                    | 3.9                |
|                                                                               | 25 <sup>th</sup> , 75 <sup>th</sup> %-ile | 3.5, 3.5               | 3.9, 3.9           |
|                                                                               |                                           |                        |                    |
|                                                                               |                                           |                        |                    |
|                                                                               |                                           |                        |                    |
|                                                                               |                                           |                        |                    |

| <b>eTable 1. Baseline Characteristics for Patients Not Included in the Final Analysis Plan</b> |                                           |                          |                      |
|------------------------------------------------------------------------------------------------|-------------------------------------------|--------------------------|----------------------|
|                                                                                                |                                           | Doxycycline<br>(N = 133) | Placebo<br>(N = 128) |
| <b>Aneurysm Volume</b>                                                                         |                                           |                          |                      |
| Overall                                                                                        | N                                         | 4                        | 3                    |
|                                                                                                | Mean (std dev)                            | 81.7 (13.1)              | 81.5 (23.0)          |
|                                                                                                | Median                                    | 84.5                     | 74.9                 |
|                                                                                                | 25 <sup>th</sup> , 75 <sup>th</sup> %-ile | 73.5, 90.0               | 62.5, 107.1          |
| Men                                                                                            | N                                         | 3                        | 2                    |
|                                                                                                | Mean (std dev)                            | 87.8 (5.9)               | 84.8 (31.5)          |
|                                                                                                | Median                                    | 85.4                     | 84.8                 |
|                                                                                                | 25 <sup>th</sup> , 75 <sup>th</sup> %-ile | 83.5, 94.5               | 62.5, 107.1          |
|                                                                                                |                                           |                          |                      |
| Women                                                                                          | N                                         | 1                        | 1                    |
|                                                                                                | Mean (std dev)                            | 63.4 ( )                 | 74.9 ( )             |
|                                                                                                | Median                                    | 63.4                     | 74.9                 |
|                                                                                                | 25 <sup>th</sup> , 75 <sup>th</sup> %-ile | 63.4, 63.4               | 74.9, 74.9           |
|                                                                                                |                                           |                          |                      |
|                                                                                                |                                           |                          |                      |
|                                                                                                |                                           |                          |                      |
|                                                                                                |                                           |                          |                      |
|                                                                                                |                                           |                          |                      |

## eAppendix 1. Sex by Treatment Interaction

In N-TA<sup>3</sup>CT we stratified randomization by sex, and the Statistical Analysis Plan (SAP) specifies that sex by treatment interaction will be assessed in the primary outcome analysis. We committed to removing the interaction term from the primary, full analysis data set multiple imputation regression model if interaction is not statistically significant (i.e.,  $p \leq .05$ ) and to evaluate treatment results separately for men and women if the interaction were significant.

The multiple imputation model of normal scores corresponding to two-year change in abdominal aortic aneurysm maximal transverse diameter (MTD) (accounting for deaths and repairs as well) resulted in a positive beta coefficient for the treatment by sex interaction, indicating a trend toward a less beneficial/more detrimental effect of doxycycline on normal scores in women than in men that was not significant according to our *a priori* criteria;  $p = .056$ .

To further investigate, we estimated treatment effects separately in men and women. In the small group of women the coefficient of treatment effect was positive, indicating a trend toward a detrimental effect of doxycycline ( $p = .07$ ). In men the coefficient was slightly negative but close to zero, suggesting no doxycycline effect ( $t = -0.25$ ,  $p = .80$ ). There is no convincing evidence of an effect of doxycycline on maximal transverse diameter growth in men or women and insufficient evidence of a difference between men and women to conclude that the analysis should be conducted separately for men and women.

We performed corresponding analyses of the actual MTD measurements in the per protocol population to assess whether this evaluation was sensitive to imputation, application of rank/normal scores and lack of adherence in the full data set analysis. The estimate of sex by treatment interaction beta coefficient was 0.089 cm with a standard error of 0.146 (95% Confidence Interval -.199 to 0.377),  $t = 0.61$  ( $p = .54$ ). There is insufficient evidence of a difference between men and women to challenge the interpretation of the primary, full analysis data set multiple imputation regression model.

We concluded that in the primary analysis results for men and women should be analyzed together instead of separately.

**eTable 2. MMP-9 and CRP Levels**

|                                 |                                                    |                                                    | <b>Doxycycline</b> | <b>Placebo</b>    | <b>Total</b>      |
|---------------------------------|----------------------------------------------------|----------------------------------------------------|--------------------|-------------------|-------------------|
| <b>Full Analysis Population</b> |                                                    |                                                    |                    |                   |                   |
| MMP-9 Levels (ng/ml)            | Baseline                                           | N                                                  | 128                | 124               | 252               |
|                                 |                                                    | Mean (std dev)                                     | 54.6 (53.2)        | 55.0 (51.1)       | 54.8 (52.1)       |
|                                 |                                                    | Median (25 <sup>th</sup> , 75 <sup>th</sup> %-ile) | 37.2 (27.3, 55.5)  | 38.4 (27.0, 62.7) | 38.0 (27.3, 57.0) |
|                                 |                                                    | 10 <sup>th</sup> , 90 <sup>th</sup> %-ile          | 20.7, 107.8        | 22.1, 107.0       | 21.8, 107.0       |
|                                 |                                                    | Min, Max                                           | 13.5, 322.8        | 9.5, 350.1        | 9.5, 350.1        |
|                                 | 6 Month                                            | N                                                  | 108                | 111               | 219               |
|                                 |                                                    | Mean (std dev)                                     | 60.9 (85.3)        | 61.9 (61.8)       | 61.4 (74.2)       |
|                                 |                                                    | Median (25 <sup>th</sup> , 75 <sup>th</sup> %-ile) | 39.2 (24.9, 62.3)  | 37.9 (25.8, 74.5) | 38.2 (25.5, 64.4) |
|                                 |                                                    | 10 <sup>th</sup> , 90 <sup>th</sup> %-ile          | 18.5, 110.5        | 21.1, 113.9       | 20.2, 113.9       |
|                                 |                                                    | Min, Max                                           | 12.4, 727.4        | 13.1, 378.8       | 12.4, 727.4       |
|                                 | 1 Year                                             | N                                                  | 111                | 100               | 211               |
|                                 |                                                    | Mean (std dev)                                     | 63.0 (90.1)        | 61.0 (91.5)       | 62.1 (90.5)       |
|                                 |                                                    | Median (25 <sup>th</sup> , 75 <sup>th</sup> %-ile) | 31.3 (23.1, 59.4)  | 31.9 (26.0, 50.5) | 31.7 (23.9, 55.7) |
|                                 |                                                    | 10 <sup>th</sup> , 90 <sup>th</sup> %-ile          | 17.5, 145.1        | 20.4, 116.2       | 18.4, 136.4       |
|                                 |                                                    | Min, Max                                           | 3.7, 630.6         | 10.7, 691.5       | 3.7, 691.5        |
|                                 | 1 Year, 6 month                                    | N                                                  | 88                 | 89                | 177               |
|                                 |                                                    | Mean (std dev)                                     | 48.8 (43.9)        | 68.3 (86.7)       | 58.6 (69.3)       |
|                                 |                                                    | Median (25 <sup>th</sup> , 75 <sup>th</sup> %-ile) | 34.4 (22.9, 53.3)  | 36.1 (25.8, 68.6) | 35.2 (24.2, 60.5) |
|                                 |                                                    | 10 <sup>th</sup> , 90 <sup>th</sup> %-ile          | 19.0, 106.6        | 21.6, 146.2       | 20.3, 119.8       |
|                                 |                                                    | Min, Max                                           | 11.5, 239.6        | 8.0, 450.6        | 8.0, 450.6        |
| 2 Year                          | N                                                  | 86                                                 | 83                 | 169               |                   |
|                                 | Mean (std dev)                                     | 53.8 (54.8)                                        | 52.8 (41.9)        | 53.3 (48.7)       |                   |
|                                 | Median (25 <sup>th</sup> , 75 <sup>th</sup> %-ile) | 34.0 (27.6, 53.2)                                  | 37.0 (23.8, 61.5)  | 35.0 (26.2, 57.1) |                   |
|                                 | 10 <sup>th</sup> , 90 <sup>th</sup> %-ile          | 21.9, 113.5                                        | 19.9, 108.6        | 20.3, 111.4       |                   |
|                                 | Min, Max                                           | 14.1, 358.2                                        | 7.9, 215.1         | 7.9, 358.2        |                   |
| 2 Year, 6 month                 | N                                                  | 7                                                  | 13                 | 20                |                   |
|                                 | Mean (std dev)                                     | 31.3 (5.0)                                         | 31.7 (13.2)        | 31.5 (10.9)       |                   |
|                                 | Median (25 <sup>th</sup> , 75 <sup>th</sup> %-ile) | 30.6 (26.8, 33.7)                                  | 31.7 (21.8, 38.3)  | 31.1 (24.8, 38.1) |                   |
|                                 | 10 <sup>th</sup> , 90 <sup>th</sup> %-ile          | 26.3, 40.6                                         | 16.4, 48.4         | 16.7, 46.3        |                   |
|                                 | Min, Max                                           | 26.3, 40.6                                         | 13.9, 56.1         | 13.9, 56.1        |                   |
| CRP (mg/l)                      | Baseline                                           | N                                                  | 128                | 124               | 252               |
|                                 |                                                    | Mean (std dev)                                     | 5.4 (13.6)         | 3.6 (4.9)         | 4.5 (10.3)        |
|                                 |                                                    | Median (25 <sup>th</sup> , 75 <sup>th</sup> %-ile) | 2.5 (1.3, 5.2)     | 2.2 (1.2, 4.2)    | 2.4 (1.2, 4.6)    |
|                                 |                                                    | 10 <sup>th</sup> , 90 <sup>th</sup> %-ile          | 0.7, 11.8          | 0.6, 8.3          | 0.7, 9.5          |
|                                 |                                                    | Min, Max                                           | 0.3, 145.6         | 0.3, 43.1         | 0.3, 145.6        |
|                                 | 6 Month                                            | N                                                  | 108                | 111               | 219               |
|                                 |                                                    | Mean (std dev)                                     | 5.4 (12.7)         | 4.5 (10.7)        | 4.9 (11.7)        |
|                                 |                                                    | Median (25 <sup>th</sup> , 75 <sup>th</sup> %-ile) | 1.8 (1.1, 3.8)     | 2.3 (1.2, 4.8)    | 2.1 (1.1, 4.6)    |
|                                 |                                                    | 10 <sup>th</sup> , 90 <sup>th</sup> %-ile          | 0.6, 8.6           | 0.8, 7.4          | 0.7, 7.8          |
|                                 |                                                    | Min, Max                                           | 0.3, 79.0          | 0.3, 110.5        | 0.3, 110.5        |
|                                 | 1 Year                                             | N                                                  | 111                | 100               | 211               |
|                                 |                                                    | Mean (std dev)                                     | 3.5 (4.8)          | 4.1 (6.9)         | 3.8 (5.9)         |
|                                 |                                                    | Median (25 <sup>th</sup> , 75 <sup>th</sup> %-ile) | 2.0 (1.0, 3.8)     | 2.4 (1.2, 4.6)    | 2.2 (1.1, 4.3)    |
|                                 |                                                    | 10 <sup>th</sup> , 90 <sup>th</sup> %-ile          | 0.6, 7.7           | 0.6, 8.3          | 0.6, 8.1          |
|                                 |                                                    | Min, Max                                           | 0.3, 31.8          | 0.4, 63.2         | 0.3, 63.2         |
|                                 | 1 Year, 6 month                                    | N                                                  | 88                 | 89                | 177               |
|                                 |                                                    | Mean (std dev)                                     | 3.5 (6.5)          | 5.7 (15.1)        | 4.6 (11.6)        |
|                                 |                                                    | Median (25 <sup>th</sup> , 75 <sup>th</sup> %-ile) | 1.7 (0.8, 3.3)     | 2.7 (1.3, 4.6)    | 1.9 (1.0, 3.8)    |
|                                 |                                                    | 10 <sup>th</sup> , 90 <sup>th</sup> %-ile          | 0.5, 6.4           | 0.9, 7.3          | 0.6, 6.6          |
|                                 |                                                    | Min, Max                                           | 0.1, 42.5          | 0.1, 124.0        | 0.1, 124.0        |

|  |                 |                                                    | <b>Doxycycline</b> | <b>Placebo</b> | <b>Total</b>   |
|--|-----------------|----------------------------------------------------|--------------------|----------------|----------------|
|  | 2 Year          | N                                                  | 86                 | 83             | 169            |
|  |                 | Mean (std dev)                                     | 5.9 (15.6)         | 4.0 (5.3)      | 5.0 (11.7)     |
|  |                 | Median (25 <sup>th</sup> , 75 <sup>th</sup> %-ile) | 1.6 (1.0, 4.3)     | 2.2 (1.0, 4.3) | 1.9 (1.0, 4.3) |
|  |                 | 10 <sup>th</sup> , 90 <sup>th</sup> %-ile          | 0.5, 7.9           | 0.7, 10.5      | 0.5, 10.5      |
|  |                 | Min, Max                                           | 0.1, 120.7         | 0.2, 26.4      | 0.1, 120.7     |
|  |                 |                                                    |                    |                |                |
|  | 2 Year, 6 month | N                                                  | 13                 | 22             | 35             |
|  |                 | Mean (std dev)                                     | 2.2 (1.4)          | 5.3 (7.2)      | 4.1 (5.9)      |
|  |                 | Median (25 <sup>th</sup> , 75 <sup>th</sup> %-ile) | 1.8 (0.9, 3.4)     | 2.6 (1.2, 6.8) | 2.3 (1.2, 5.0) |
|  |                 | 10 <sup>th</sup> , 90 <sup>th</sup> %-ile          | 0.5, 3.5           | 0.8, 8.6       | 0.8, 8.0       |
|  |                 | Min, Max                                           | 0.4, 5.0           | 0.5, 33.5      | 0.4, 33.5      |

| Per Protocol Population |                 |                                                    | Doxycycline       | Placebo           | Total             |
|-------------------------|-----------------|----------------------------------------------------|-------------------|-------------------|-------------------|
| MMP-9 Levels (ng/ml)    | Baseline        | N                                                  | 67                | 72                | 139               |
|                         |                 | Mean (std dev)                                     | 54.1 (51.4)       | 54.2 (52.5)       | 54.2 (51.8)       |
|                         |                 | Median (25 <sup>th</sup> , 75 <sup>th</sup> %-ile) | 35.8 (28.1, 55.2) | 38.9 (27.0, 62.7) | 37.6 (27.4, 57.2) |
|                         |                 | 10 <sup>th</sup> , 90 <sup>th</sup> %-ile          | 22.6, 111.1       | 21.1, 104.8       | 21.8, 107.0       |
|                         |                 | Min, Max                                           | 15.3, 305.4       | 9.5, 350.1        | 9.5, 350.1        |
| 6 Month                 | 6 Month         | N                                                  | 66                | 71                | 137               |
|                         |                 | Mean (std dev)                                     | 65.4 (103.3)      | 67.5 (70.2)       | 66.5 (87.4)       |
|                         |                 | Median (25 <sup>th</sup> , 75 <sup>th</sup> %-ile) | 38.1 (25.1, 61.9) | 37.9 (28.0, 86.3) | 37.9 (26.3, 65.0) |
|                         |                 | 10 <sup>th</sup> , 90 <sup>th</sup> %-ile          | 20.2, 110.5       | 20.9, 152.7       | 20.7, 113.9       |
|                         |                 | Min, Max                                           | 12.4, 727.4       | 13.1, 378.8       | 12.4, 727.4       |
| 1 Year                  | 1 Year          | N                                                  | 66                | 68                | 134               |
|                         |                 | Mean (std dev)                                     | 51.8 (65.6)       | 65.5 (106.0)      | 58.8 (88.4)       |
|                         |                 | Median (25 <sup>th</sup> , 75 <sup>th</sup> %-ile) | 30.3 (23.1, 45.5) | 32.1 (25.4, 48.4) | 31.4 (23.7, 47.6) |
|                         |                 | 10 <sup>th</sup> , 90 <sup>th</sup> %-ile          | 17.4, 125.5       | 18.9, 143.2       | 18.4, 125.5       |
|                         |                 | Min, Max                                           | 3.7, 478.5        | 10.7, 691.5       | 3.7, 691.5        |
| 1 Year, 6 month         | 1 Year, 6 month | N                                                  | 58                | 65                | 123               |
|                         |                 | Mean (std dev)                                     | 50.7 (50.5)       | 73.5 (97.4)       | 62.7 (79.4)       |
|                         |                 | Median (25 <sup>th</sup> , 75 <sup>th</sup> %-ile) | 31.1 (22.2, 51.1) | 35.2 (25.8, 68.6) | 34.0 (23.8, 60.5) |
|                         |                 | 10 <sup>th</sup> , 90 <sup>th</sup> %-ile          | 17.3, 119.8       | 21.6, 184.1       | 20.3, 142.6       |
|                         |                 | Min, Max                                           | 11.5, 239.6       | 8.0, 450.6        | 8.0, 450.6        |
| 2 Year                  | 2 Year          | N                                                  | 58                | 56                | 114               |
|                         |                 | Mean (std dev)                                     | 57.5 (59.0)       | 50.4 (41.4)       | 54.0 (51.0)       |
|                         |                 | Median (25 <sup>th</sup> , 75 <sup>th</sup> %-ile) | 34.5 (29.2, 58.0) | 36.1 (25.4, 57.7) | 35.0 (26.8, 58.0) |
|                         |                 | 10 <sup>th</sup> , 90 <sup>th</sup> %-ile          | 21.9, 126.0       | 19.5, 106.6       | 21.2, 113.5       |
|                         |                 | Min, Max                                           | 14.1, 358.2       | 7.9, 215.1        | 7.9, 358.2        |
| 2 Year, 6 month         | 2 Year, 6 month | N                                                  | 6                 | 9                 | 15                |
|                         |                 | Mean (std dev)                                     | 31.8 (5.3)        | 28.0 (10.2)       | 29.5 (8.6)        |
|                         |                 | Median (25 <sup>th</sup> , 75 <sup>th</sup> %-ile) | 31.7 (26.8, 33.7) | 26.8 (21.8, 36.0) | 30.6 (23.4, 36.0) |
|                         |                 | 10 <sup>th</sup> , 90 <sup>th</sup> %-ile          | 26.3, 40.6        | 13.9, 44.3        | 16.4, 40.6        |
|                         |                 | Min, Max                                           | 26.3, 40.6        | 13.9, 44.3        | 13.9, 44.3        |
| CRP (mg/l)              | Baseline        | N                                                  | 67                | 72                | 139               |
|                         |                 | Mean (std dev)                                     | 5.7 (17.7)        | 3.4 (3.1)         | 4.5 (12.5)        |
|                         |                 | Median (25 <sup>th</sup> , 75 <sup>th</sup> %-ile) | 2.3 (1.1, 5.5)    | 2.4 (1.2, 4.1)    | 2.3 (1.2, 4.7)    |
|                         |                 | 10 <sup>th</sup> , 90 <sup>th</sup> %-ile          | 0.5, 10.6         | 0.9, 7.2          | 0.7, 8.4          |
|                         |                 | Min, Max                                           | 0.3, 145.6        | 0.3, 14.8         | 0.3, 145.6        |
| CRP (mg/l)              | 6 Month         | N                                                  | 66                | 71                | 137               |
|                         |                 | Mean (std dev)                                     | 3.2 (8.0)         | 3.8 (3.4)         | 3.5 (6.1)         |
|                         |                 | Median (25 <sup>th</sup> , 75 <sup>th</sup> %-ile) | 1.6 (0.9, 3.1)    | 2.7 (1.3, 5.4)    | 2.1 (1.1, 4.3)    |
|                         |                 | 10 <sup>th</sup> , 90 <sup>th</sup> %-ile          | 0.5, 5.5          | 0.7, 7.8          | 0.6, 7.1          |
|                         |                 | Min, Max                                           | 0.3, 65.5         | 0.4, 16.2         | 0.3, 65.5         |
| 1 Year                  | 1 Year          | N                                                  | 66                | 68                | 134               |
|                         |                 | Mean (std dev)                                     | 2.9 (4.3)         | 4.4 (7.7)         | 3.7 (6.3)         |
|                         |                 | Median (25 <sup>th</sup> , 75 <sup>th</sup> %-ile) | 1.7 (0.8, 3.3)    | 2.7 (1.3, 5.3)    | 2.2 (1.1, 4.0)    |
|                         |                 | 10 <sup>th</sup> , 90 <sup>th</sup> %-ile          | 0.5, 5.1          | 0.7, 8.1          | 0.6, 6.6          |
|                         |                 | Min, Max                                           | 0.3, 30.7         | 0.4, 63.2         | 0.3, 63.2         |
| 1 Year, 6 month         | 1 Year, 6 month | N                                                  | 58                | 65                | 123               |
|                         |                 | Mean (std dev)                                     | 3.1 (5.6)         | 6.6 (17.4)        | 4.9 (13.3)        |
|                         |                 | Median (25 <sup>th</sup> , 75 <sup>th</sup> %-ile) | 1.2 (0.7, 3.1)    | 2.6 (1.3, 4.2)    | 1.9 (1.0, 3.9)    |
|                         |                 | 10 <sup>th</sup> , 90 <sup>th</sup> %-ile          | 0.4, 5.7          | 0.9, 6.7          | 0.6, 6.4          |
|                         |                 | Min, Max                                           | 0.2, 35.9         | 0.1, 124.0        | 0.1, 124.0        |

|  |                |                                                    | <b>Doxycycline</b> | <b>Placebo</b> | <b>Total</b>   |
|--|----------------|----------------------------------------------------|--------------------|----------------|----------------|
|  | 2 Year         | N                                                  | 58                 | 56             | 114            |
|  |                | Mean (std dev)                                     | 3.2 (6.5)          | 4.6 (5.5)      | 3.9 (6.1)      |
|  |                | Median (25 <sup>th</sup> , 75 <sup>th</sup> %-ile) | 1.5 (0.7, 3.4)     | 2.6 (1.1, 5.2) | 2.0 (1.0, 4.0) |
|  |                | 10 <sup>th</sup> , 90 <sup>th</sup> %-ile          | 0.5, 6.1           | 0.8, 11.9      | 0.5, 10.4      |
|  |                | Min, Max                                           | 0.1, 47.0          | 0.2, 26.4      | 0.1, 47.0      |
|  | 2 Year 6 month | N                                                  | 10                 | 16             | 26             |
|  |                | Mean (std dev)                                     | 1.6 (1.1)          | 6.3 (8.2)      | 4.5 (6.8)      |
|  |                | Median (25 <sup>th</sup> , 75 <sup>th</sup> %-ile) | 1.5 (0.8, 2.1)     | 3.6 (1.5, 8.0) | 2.0 (1.2, 5.7) |
|  |                | 10 <sup>th</sup> , 90 <sup>th</sup> %-ile          | 0.5, 3.5           | 0.8, 14.2      | 0.5, 8.6       |
|  |                | Min, Max                                           | 0.4, 3.5           | 0.5, 33.5      | 0.4, 33.5      |
|  |                |                                                    |                    |                |                |



**eTable 3. Frequency of Expected Adverse Events**

| Symptom                                                               | Expected Adverse Events |                  | Difference | (95% CI)          | p-value |
|-----------------------------------------------------------------------|-------------------------|------------------|------------|-------------------|---------|
|                                                                       | Doxycycline<br>N=129    | Placebo<br>N=125 |            |                   |         |
| Any symptom reported                                                  | 121 (93.8%)             | 111 (88.8%)      | 5.0%       | ( -1.9 – 11.9 %)  | .16     |
| Frequent joint pain                                                   | 84 (65.1%)              | 79 (63.2%)       | 1.9%       | ( -9.9 – 13.7 %)  | .75     |
| Frequent gastric or intestinal upset                                  | 58 (45.0%)              | 56 (44.8%)       | 0.2%       | (-12.1 – 12.4 %)  | .98     |
| Frequent bleeding or bruising                                         | 47 (36.4%)              | 54 (43.2%)       | -6.8%      | ( -18.8 – 5.3 %)  | .27     |
| Frequent spells of dizziness                                          | 34 (26.4%)              | 37 (29.6%)       | -3.2%      | ( -14.3 – 7.8 %)  | .56     |
| Skin rash or hives                                                    | 41 (31.8%)              | 29 (23.2%)       | 8.6%       | ( -2.3 – 19.5 %)  | .13     |
| Visual disturbance                                                    | 26 (20.2%)              | 43 (34.4%)       | -14.2%     | ( -25.1 – -3.4 %) | .01     |
| Moderate to severe sunburn                                            | 38 (29.5%)              | 14 (11.2%)       | 18.3%      | ( 8.6 – 28.8 %)   | < .001  |
| Frequent headaches                                                    | 27 (20.9%)              | 20 (16.0%)       | 4.9%       | ( -4.6 – 14.5 %)  | .31     |
| Tooth discoloration                                                   | 12 (9.30%)              | 18 (14.4%)       | -5.1%      | ( -13.0 – 3.8 %)  | .21     |
| Fever                                                                 | 11 (8.50%)              | 18 (14.4%)       | -5.9%      | ( -13.7 – 1.9 %)  | .14     |
| Other symptom requiring study drug dose adjustment or discontinuation | 27 (20.9%)              | 27 (21.6%)       | -0.7%      | ( -10.7 – 9.4 %)  | .90     |

**eTable 4. Doxycycline Levels**

| Measurement         | Visit           |                                                    | Full Analysis Population | Per-Protocol Population |
|---------------------|-----------------|----------------------------------------------------|--------------------------|-------------------------|
| Doxycycline (ng/mL) | 6 Month         | N                                                  | 102                      | 66                      |
|                     |                 | Mean (std dev)                                     | 3099.8 (2195.0)          | 3681.2 (2138.4)         |
|                     |                 | Median (25 <sup>th</sup> , 75 <sup>th</sup> %-ile) | 2795.0 (1189.7, 4759.6)  | 3523.7 (2193.4, 4982.1) |
|                     |                 | 10 <sup>th</sup> , 90 <sup>th</sup> %-ile          | 415.5, 6077.5            | 797.7, 6854.0           |
|                     |                 | Min, Max                                           | 0.0, 9362.4              | 0.0, 9362.4             |
|                     | 1 Year          | N                                                  | 79                       | 52                      |
|                     |                 | Mean (std dev)                                     | 3165.0 (2355.4)          | 3729.0 (2285.2)         |
|                     |                 | Median (25 <sup>th</sup> , 75 <sup>th</sup> %-ile) | 2998.0 (1164.2, 4742.3)  | 3740.0 (1707.1, 5135.8) |
|                     |                 | 10 <sup>th</sup> , 90 <sup>th</sup> %-ile          | 0.0, 6226.8              | 1099.7, 6531.9          |
|                     |                 | Min, Max                                           | 0.0, 9689.4              | 0.0, 9689.4             |
|                     | 1 Year, 6 month | N                                                  | 48                       | 34                      |
|                     |                 | Mean (std dev)                                     | 2844.8 (2412.9)          | 3172.8 (2513.0)         |
|                     |                 | Median (25 <sup>th</sup> , 75 <sup>th</sup> %-ile) | 1972.2 (665.8, 5050.3)   | 2410.9 (988.1, 5497.5)  |
|                     |                 | 10 <sup>th</sup> , 90 <sup>th</sup> %-ile          | 0.0, 6196.7              | 493.0, 6345.5           |
|                     |                 | Min, Max                                           | 0.0, 8554.0              | 0.0, 8554.0             |
|                     | 2 Year          | N                                                  | 36                       | 25                      |
|                     |                 | Mean (std dev)                                     | 2390.0 (2517.4)          | 2750.7 (2539.8)         |
|                     |                 | Median (25 <sup>th</sup> , 75 <sup>th</sup> %-ile) | 1881.9 (0.0, 4106.2)     | 2046.9 (370.3, 4626.5)  |
|                     |                 | 10 <sup>th</sup> , 90 <sup>th</sup> %-ile          | 0.0, 6655.3              | 0.0, 6655.3             |
|                     |                 | Min, Max                                           | 0.0, 8858.2              | 0.0, 8858.2             |

Doxycycline assay was performed using an ultra-high performance liquid chromatography (UHPLC)-mass spectrometry (MS)/mass spectrometry (MS) method developed for this study because liquid chromatography methods used in animal studies returned false positive levels of doxycycline in specimens obtained at baseline.<sup>31</sup> Of 133 specimens from patients assigned to placebo, four (3%) were positive for doxycycline. These patients were not reported to be taking doxycycline and tracking of their study treatment kits found all to have been properly handled placebo treatments leaving errors in labeling or transcription in the clinical site or laboratory as a possibility.

Seelam RR, Terrin M, Hassan HE. Validated UHPLC-MS/MS method for quantification of doxycycline in abdominal aortic aneurysm patients. *Bioanalysis*. 2018;10(8):527-539.
