# Supplementary material
Source: PubMed Central journal article supplement (PMC7251450)
Supplement: jama-323-2029-s004.pdf [file jama-323-2029-s004.pdf]

## **Data Sharing Statement**

### **Data**

**Data available:** Yes

**Data types:** Deidentified participant data

**How to access data:** We plan to submit the data file to the NIA for release to the public domain.

**When available:** beginning date: 12-06-2020

### **Supporting Documents**

**Document types:** None

### **Additional Information**

**Who can access the data:** Anyone requesting the de-identified data file.

**Types of analyses:** For any purpose.

**Mechanisms of data availability:** as per NIH data commons.

**Any additional restrictions:** None.
